# Supplementary material
Source: MDPI journal article supplement (https://www.mdpi.com/2673-6918/3/1/22)
Supplement: s1 [file s1]

# **Synthesis and Spectral, Thermal and Antimicrobial Investigation of Mixed Ligand Metal Complexes of *N*-Salicylidene Aniline and 1,10-Phenanthroline**

**Amira A. Mohamed <sup>1</sup>, Abeer A. Nassr <sup>2</sup>, Sadeek A. Sadeek <sup>2</sup> and Hazem S. Elshafie <sup>3,\*</sup>**

<sup>1</sup> Department of Basic Science, Zagazig Higher Institute of Engineering and Technology, Zagazig 44519, Egypt

<sup>2</sup> Department of Chemistry, Faculty of Science, University of Zagazig, Zagazig 44519, Egypt

<sup>3</sup> School of Agricultural, Forestry, Food and Environmental Sciences, University of Basilicata, Viale dell'Ateneo Lucano, Potenza 85100, Italy

\* Correspondence: hazem.elshafie@unibas.it; Tel.: +39-0971-205498; Fax: +39-0971-205503

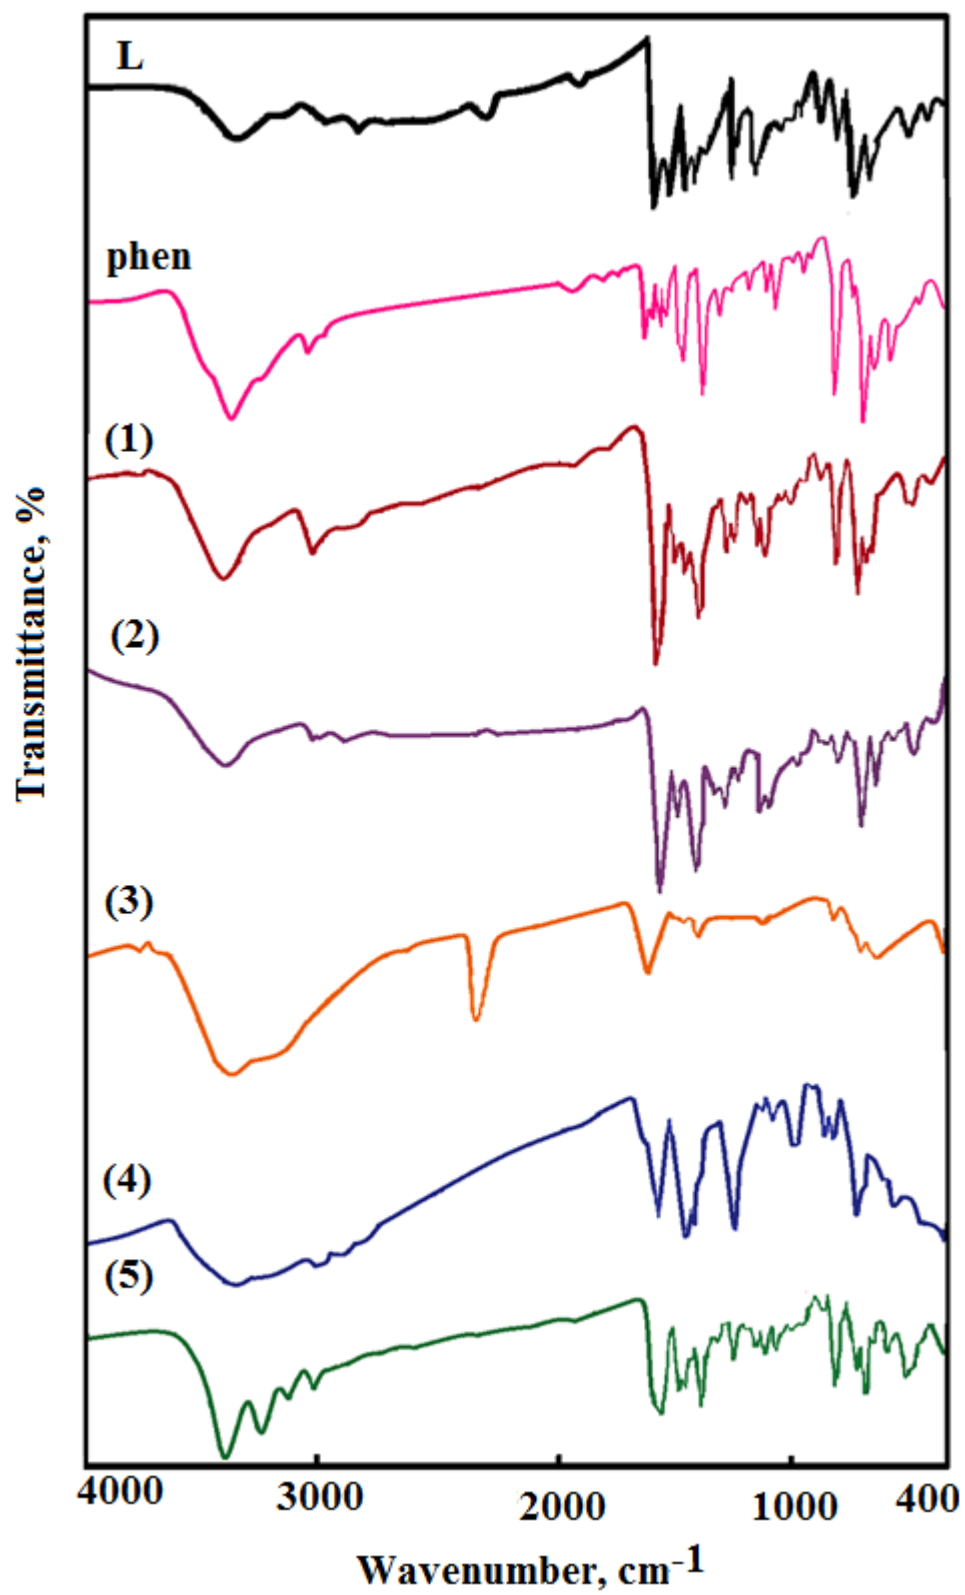

Figure S1: Infrared spectra for **L**, **phen** and their complexes.

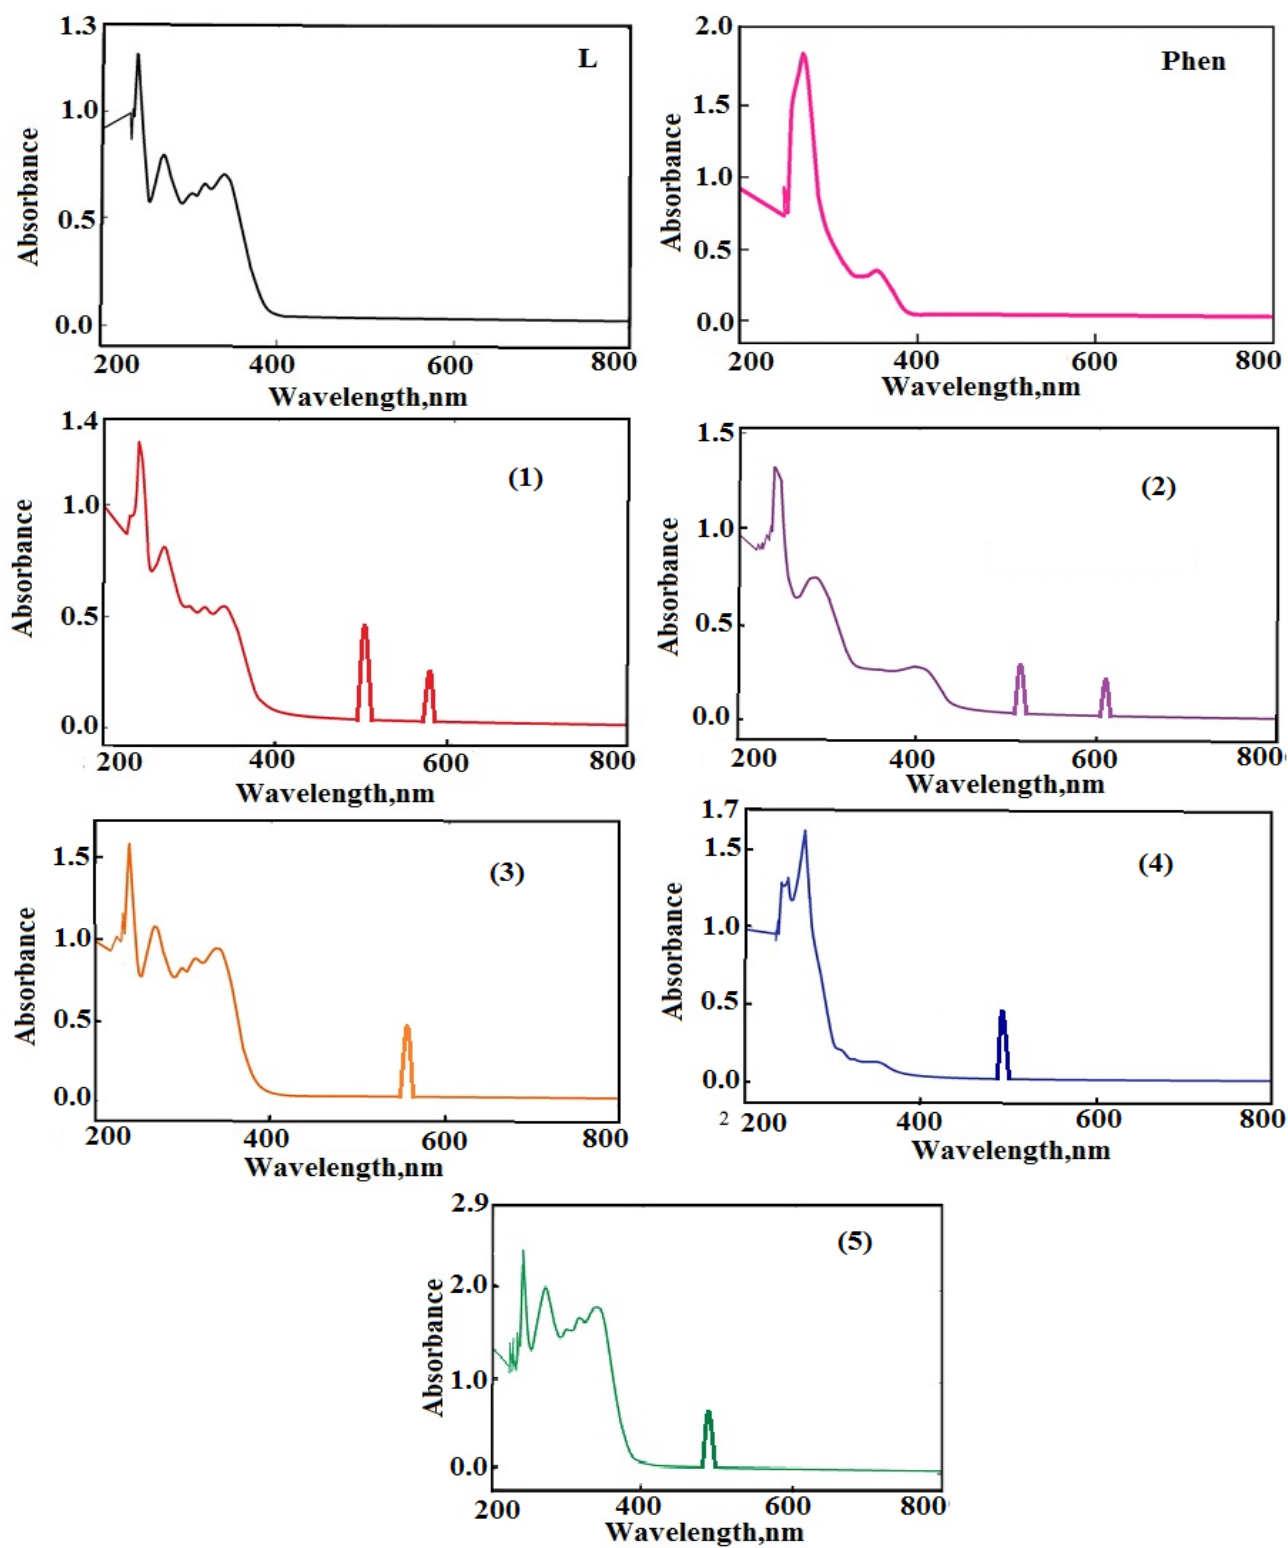

Figure S2: Electronic spectra for **L**, **phen** and their complexes.

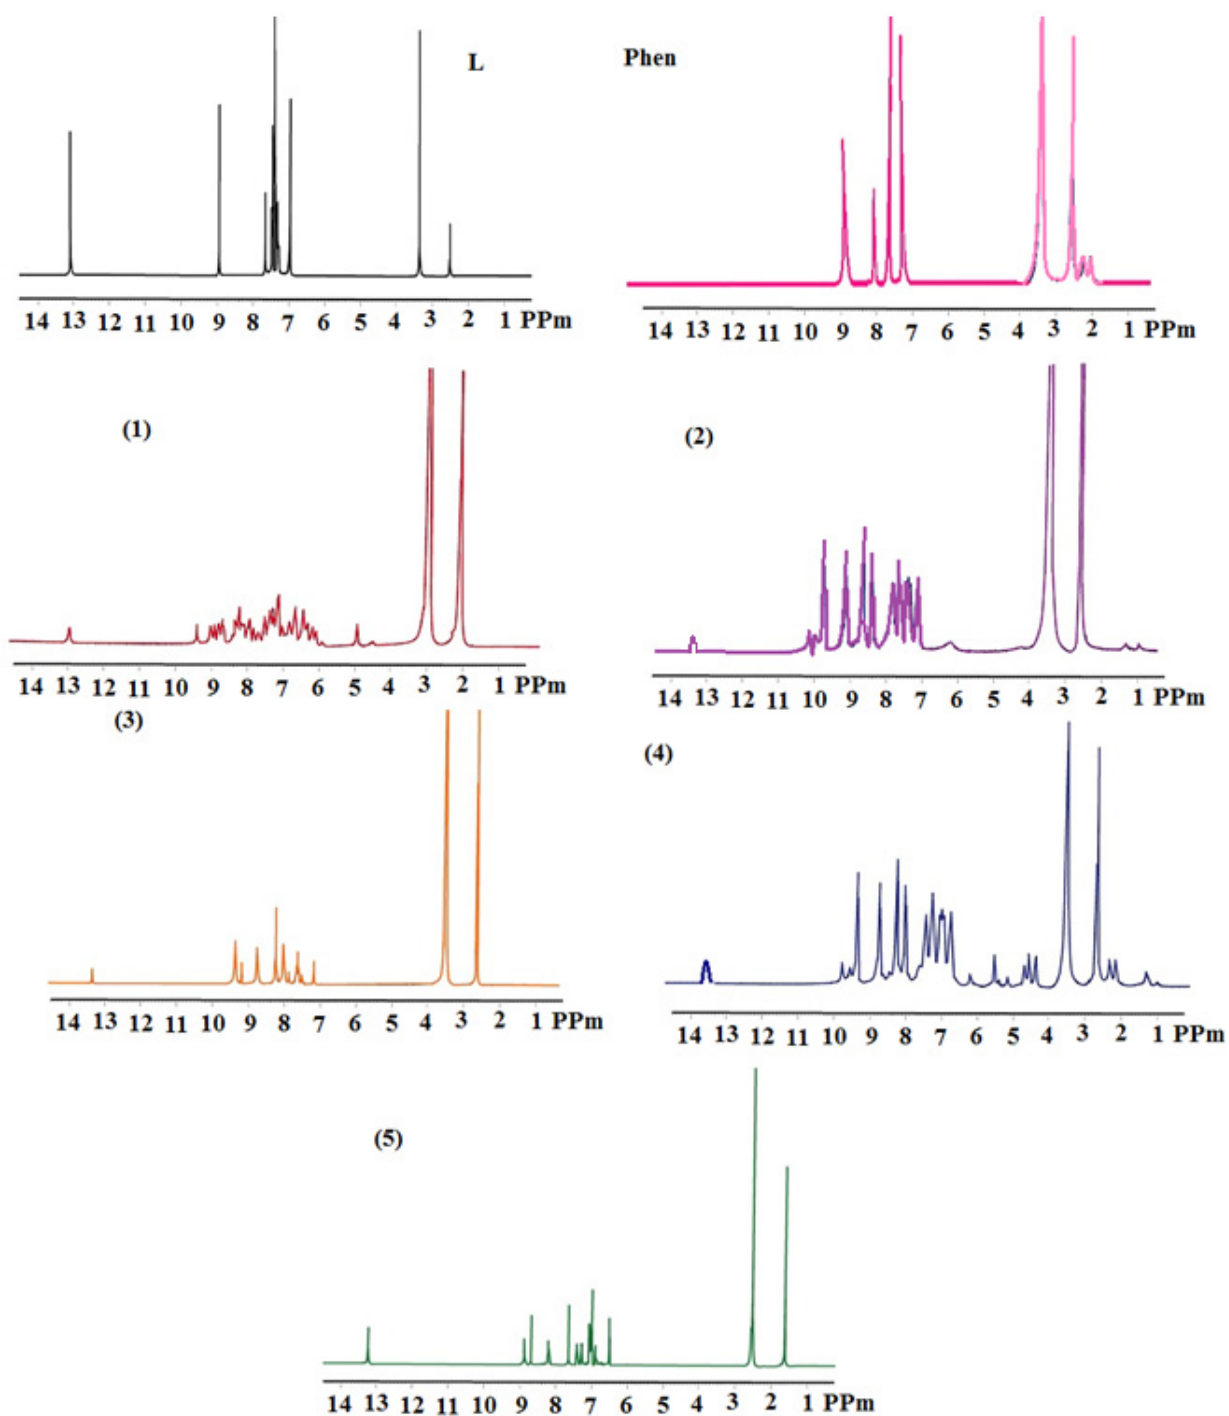

**Figure S3:**  $^1\text{H}$  NMR spectra for **L**, **phen** and their complexes.

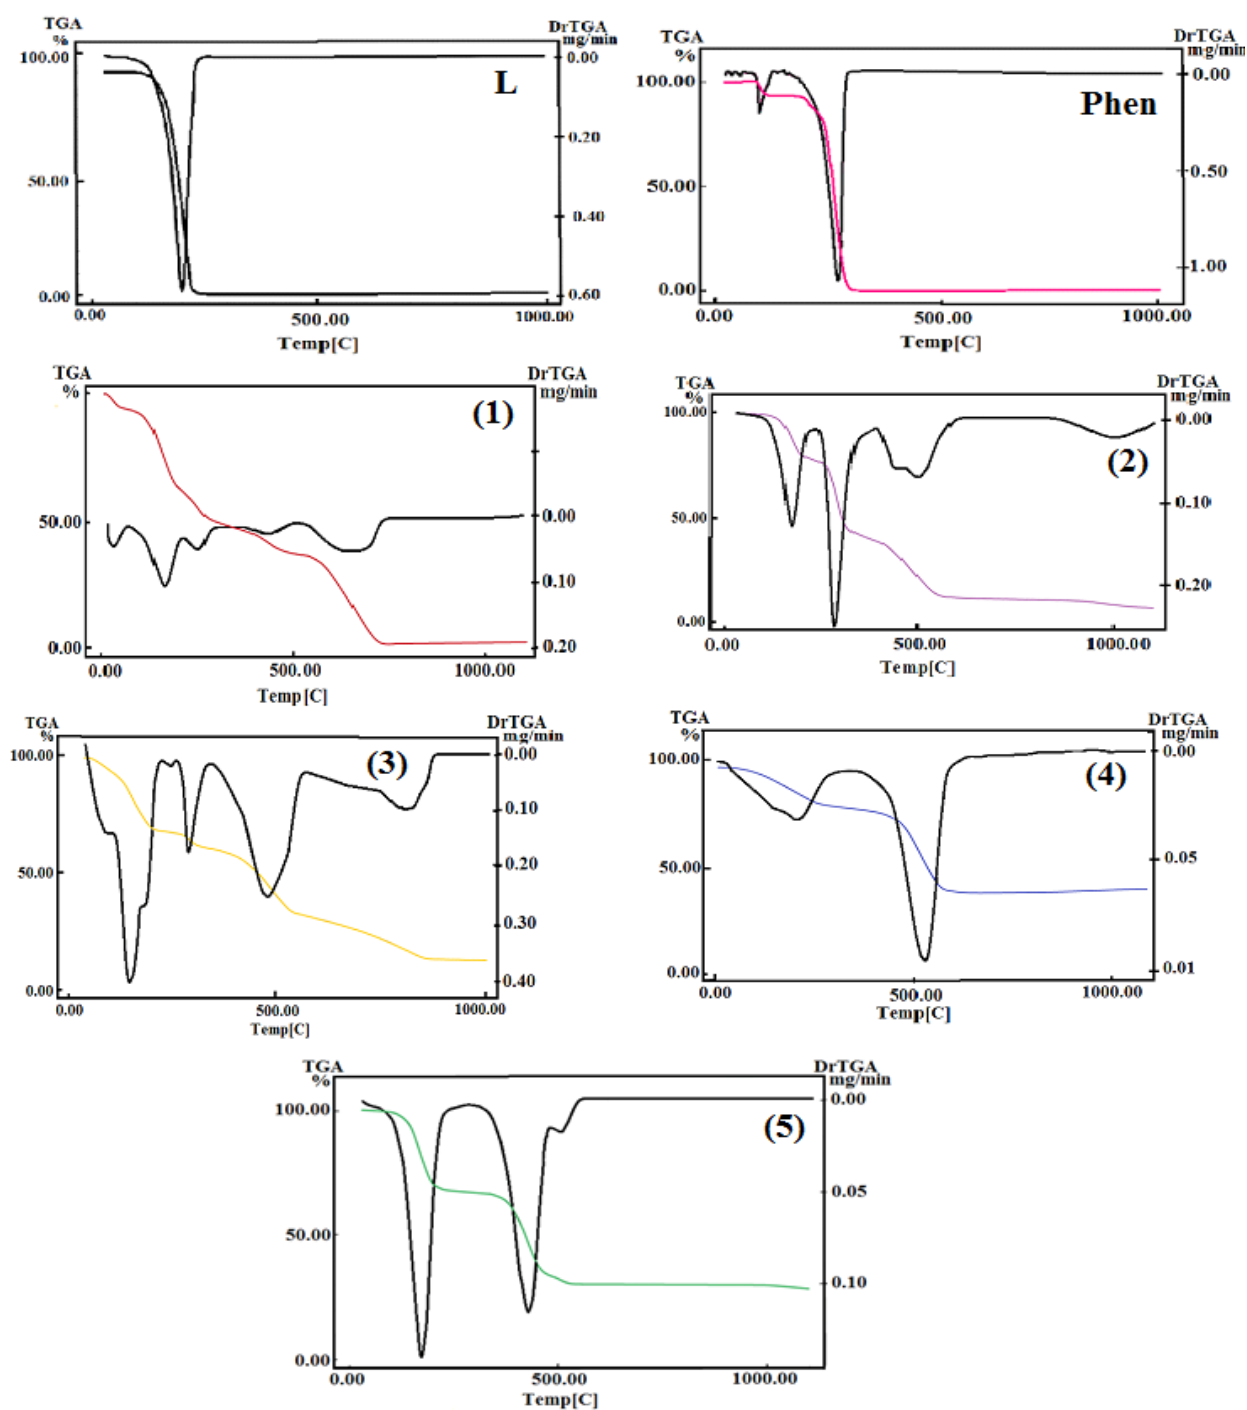

Figure S4: TG and DTG for L, phen and their complexes.
